# Supplementary figures and images for: Effects of Experimental Warming and Canada Goldenrod Invasion on the Diversity and Function of the Soil Nematode Community
Source: MDPI journal article supplement (doi:10.3390/su132313145), 2021-11-27

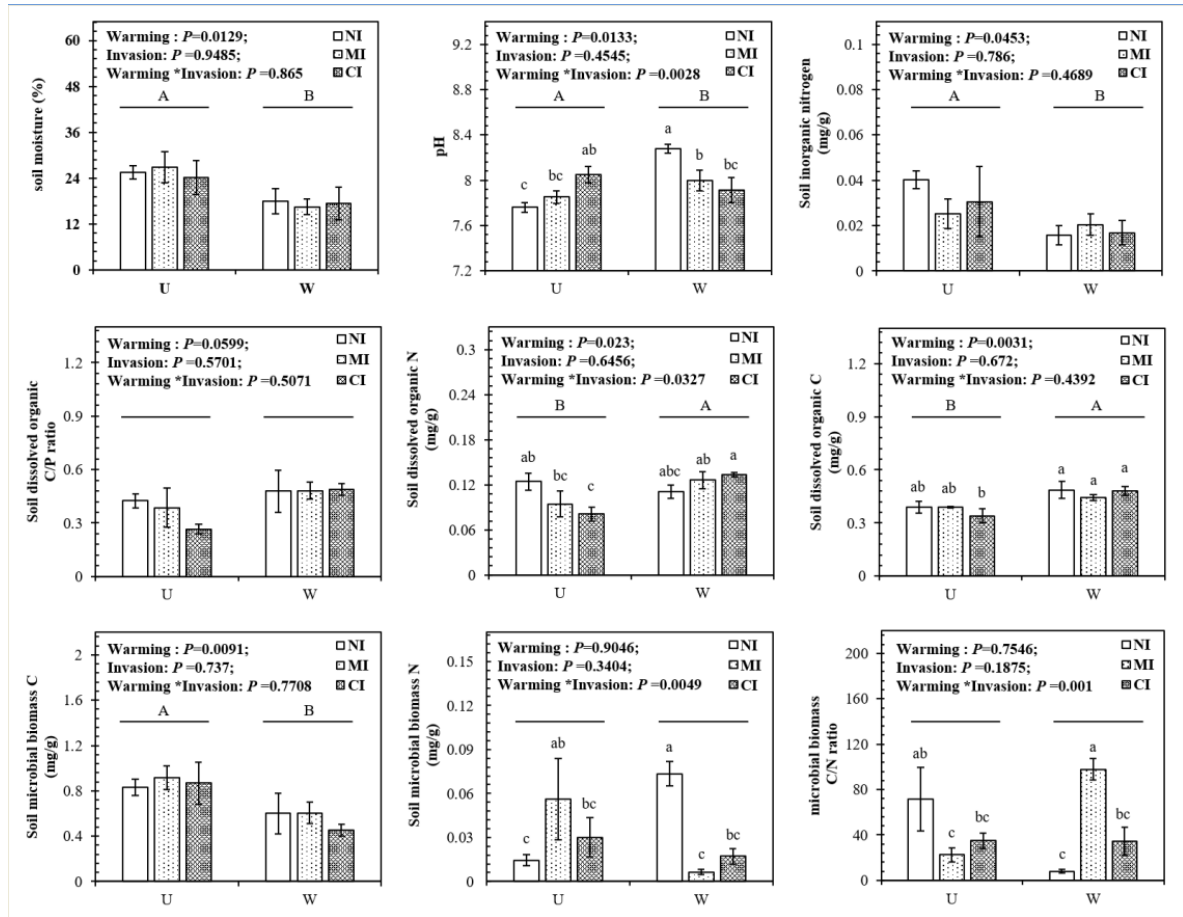

**Figure S1.** The influence of warming and Canada goldenrod invasion on soil properties.

Supplement: s1 [file s1]
